# Supplementary material for: The Effect of Substrate Properties on Cellular Behavior and Nanoparticle Uptake in Human Fibroblasts and Epithelial Cells
Source: MDPI journal article supplement (doi:10.3390/nano14040342), 2024-02-10
Supplement: s1 [file s1]

# Supporting Information

## Effect of substrate properties on cellular behavior and nanoparticle uptake in human fibroblasts and epithelial cells

**Mauro Sousa de Almeida**<sup>1</sup>, **Aaron Lee**<sup>1,2</sup>, **Fabian Itel**<sup>3</sup>, **Katharina Maniura-Weber**<sup>4</sup>, **Alke Petri-Fink**<sup>1,5</sup> and **Barbara Rothen-Rutishauser**<sup>1,\*</sup>

<sup>1</sup> Adolphe Merkle Institute and National Center of Competence in Research Bio-Inspired Materials,  
University of Fribourg, Chemin des Verdiers 4, 1700 Fribourg, Switzerland;  
mauro.sousadealmeida@unifr.ch (M.S.d.A.); a.lee22@imperial.ac.uk (A.L.);  
alke.fink@unifr.ch (A.P.-F.)

<sup>2</sup> Department of Bioengineering, Imperial College London, South Kensington, London SW7 2BP, UK

<sup>3</sup> Empa, Swiss Federal Laboratories for Materials Science and Technology, Laboratory for Biomimetic  
Membranes and Textiles, Lerchenfeldstrasse 5, 9014 St. Gallen, Switzerland;  
fabian.itel@empa.ch

<sup>4</sup> Empa, Swiss Federal Laboratories for Materials Science and Technology, Laboratory for Biointerfaces, Lerchenfeldstrasse 5, 9014 St. Gallen, Switzerland;  
katharina.maniura@empa.ch

<sup>5</sup> Department of Chemistry, University of Fribourg, Chemin du Musée 9, 1700 Fribourg, Switzerland

\* Correspondence: barbara.rothen@unifr.ch

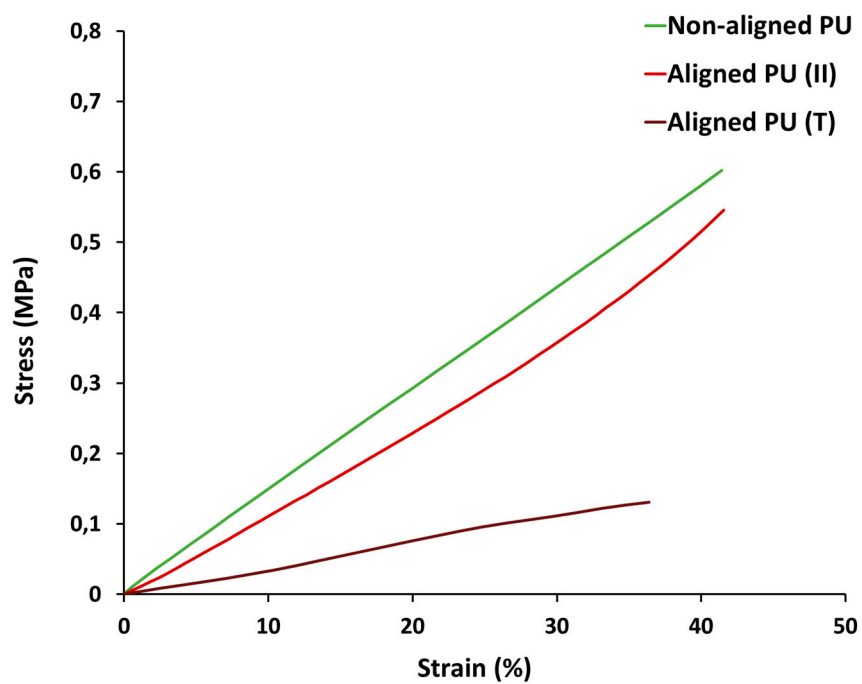

**Figure S1** – Tensile test measurements of both aligned and non-aligned polyurethane (PU) fibers. II – fibers along the strain direction; T – fibers perpendicular to the strain direction.

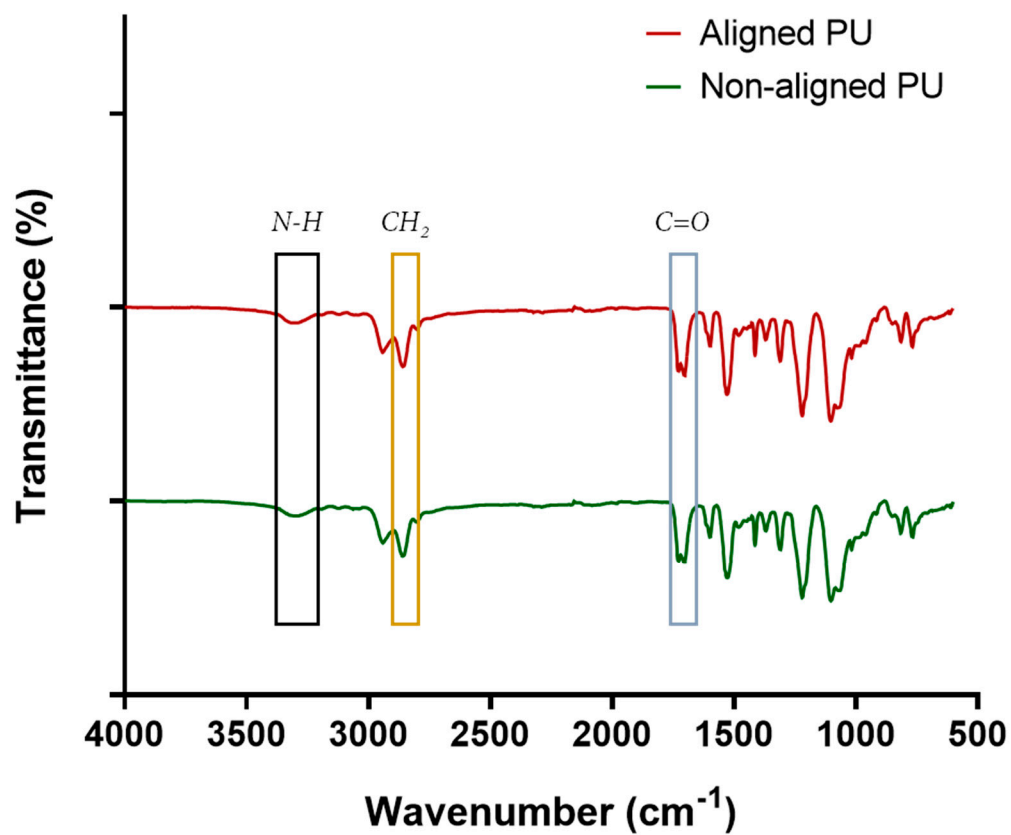

**Figure S2** - Fourier-transformed infrared (FTIR) spectra of both aligned and non-aligned polyurethane (PU) fibers.

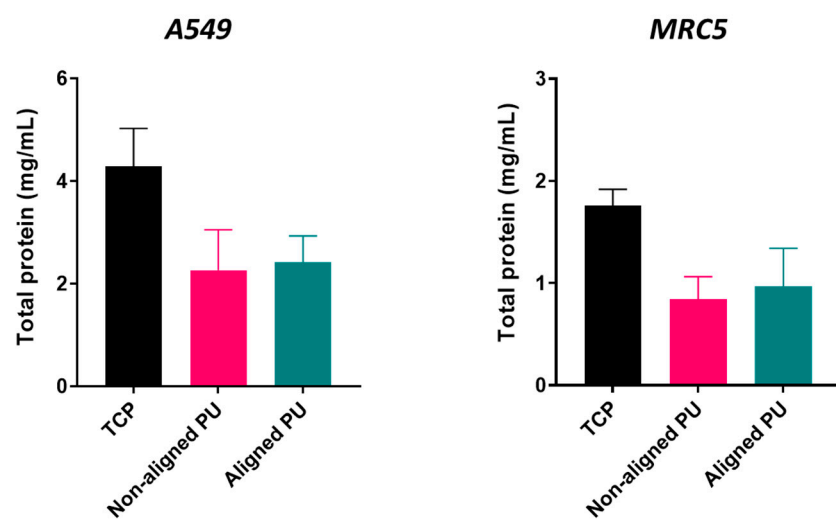

**Figure S3** – Total protein content of A549 and MRC-5 cells after 72 and 48 hours, respectively. Data are presented as mean  $\pm$  standard error of the mean (n=3).

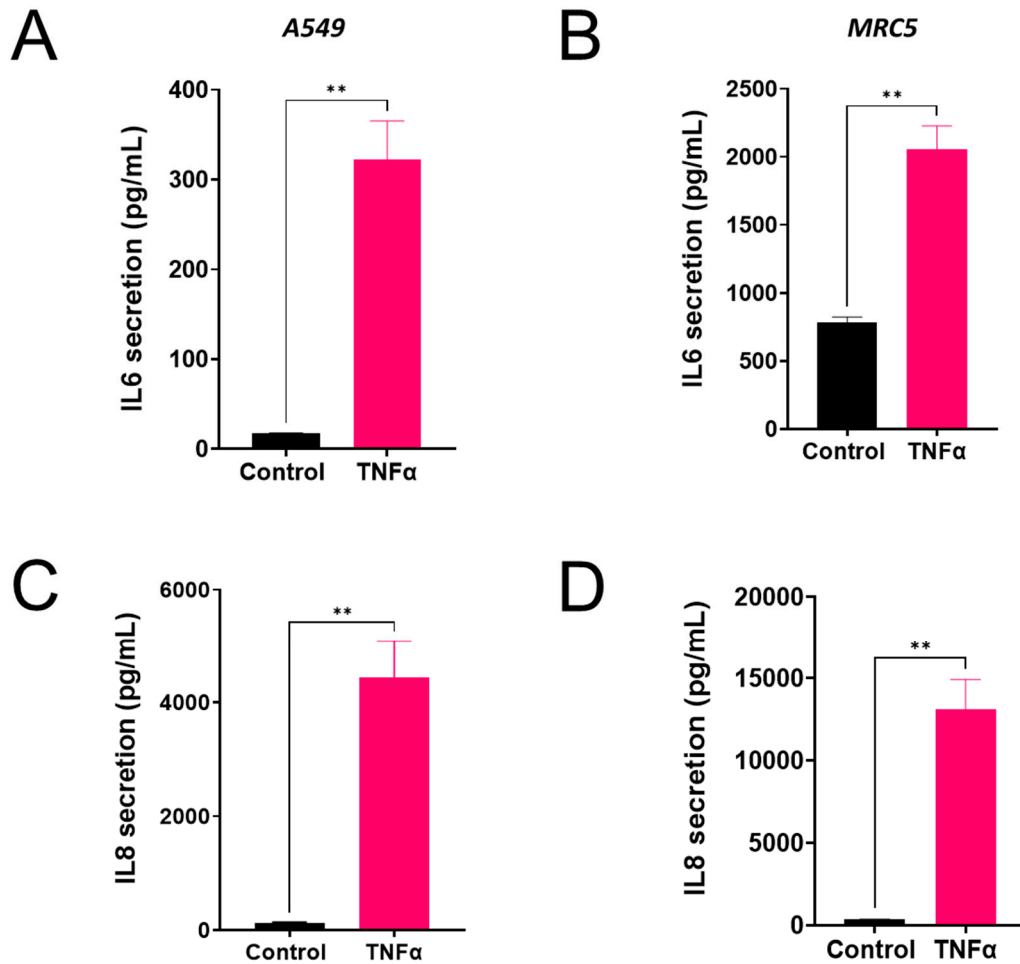

**Figure S4** – Effect of the positive control tumor necrosis factor alpha (TNFα) on the secretion of inflammatory cytokines in lung epithelial cells (A549) and lung fibroblast (MRC-5). Bar graphs, at the top, show the release of interleukin (IL)-6 upon A549 (A) and MRC-5 (B) cell exposure to TNFα. Bar graphs, at the bottom, show the release of IL-8 upon A549 (C) and MRC-5 (D) cell exposure to TNFα. TNFα was added for 24 h at 1 μg/mL to A549 cells and 10 ng/mL to MRC-5 cells. Data are presented as mean ± standard error of the mean (n=3). Statistical significance was determined by unpaired t-test and represented by \*\*p ≤ 0.01.

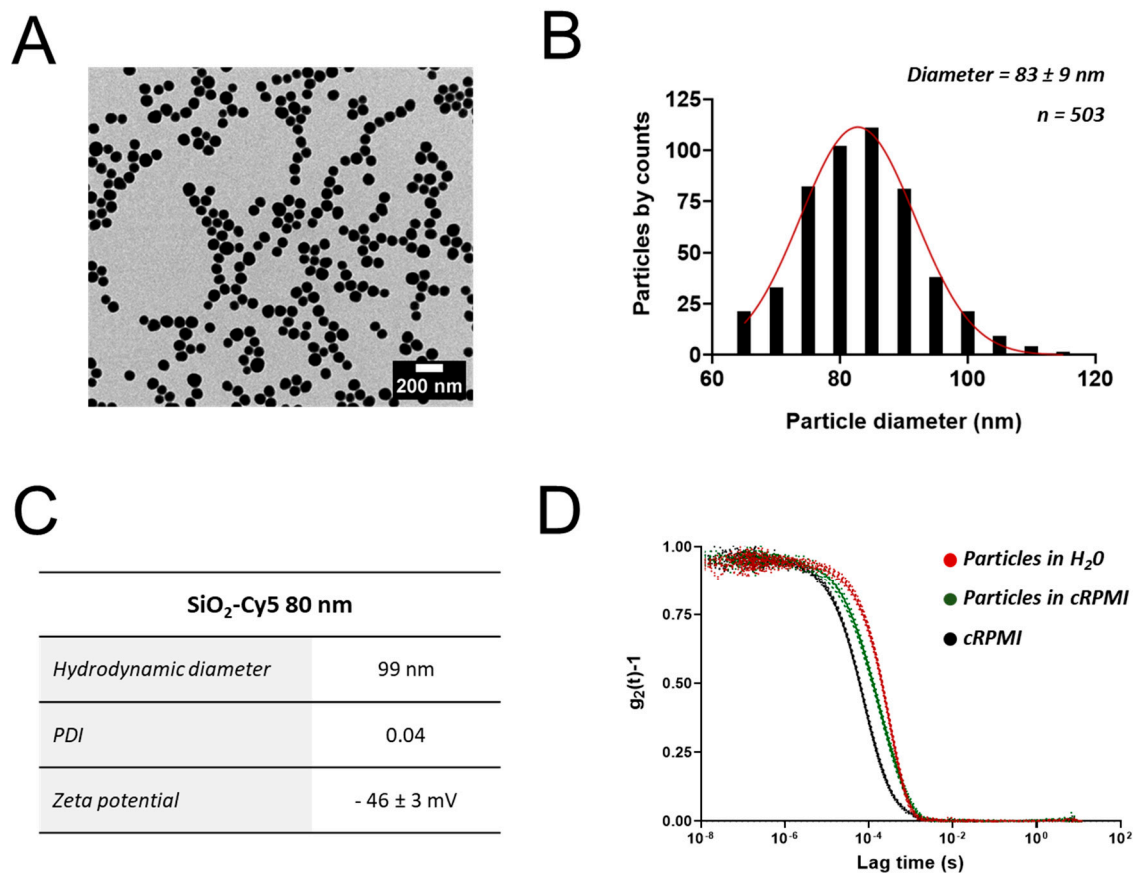

**Figure S5** - Physicochemical properties of SiO<sub>2</sub> nanoparticles (NPs) and colloidal stability in cell culture medium. (A) Representative transmission electron microscopy (TEM) images and particle size distribution (B) of 83 nm SiO<sub>2</sub>-Cy5 NPs. (C) Hydrodynamic diameter, polydispersity index (PDI) and zeta potential determined by dynamic and phase analysis light scattering in water. (D) Correlation functions of SiO<sub>2</sub>-Cy5 NPs in water and supplemented cell culture medium (cRPMI) determined by dynamic light scattering. Correlation function of cRPMI only is also represented.

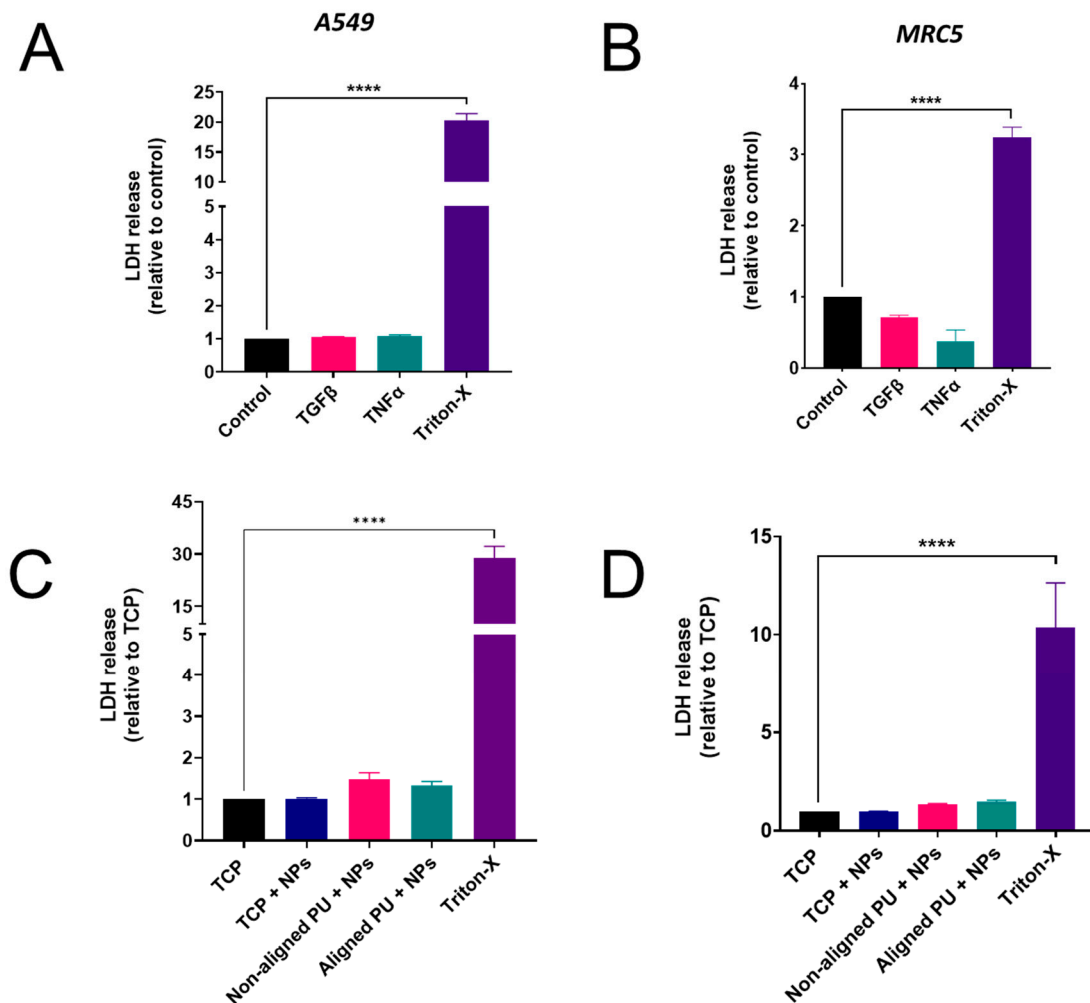

**Figure S6** – Cytotoxicity of positive controls and SiO<sub>2</sub> nanoparticles (NPs) in lung epithelial cells (A549) and fibroblasts (MRC-5). Bar graphs, at the top, represent the release of lactate dehydrogenase relative to tissue culture plastic (TCP) from A549 (**A**) and MRC-5 cells (**B**) exposed to transforming growth factor beta (TGF-β) and tumor necrosis factor alpha (TNFα). TGF-β was added for 24 h to A549 and MRC-5 cells at a concentration of 10 ng/mL and 5 ng/mL respectively. TNFα was added for 24 h at 1 μg/mL to A549 cells and 10 ng/mL to MRC-5 cells. Bar graphs, at the bottom, show the release of lactate dehydrogenase relative to tissue culture plastic (TCP) from A549 (**C**) and MRC-5 cells (**D**) exposed for 24 h to 20 μg/mL of SiO<sub>2</sub> NPs. Data are presented as mean ± standard error of the mean (n=3). Statistical significance was determined by One-way ANOVA Dunnett's post-hoc test for multiple comparisons and represented by \*\*\*\*p ≤ 0.0001.
